RESEARCH ARTICLE

# Proportion and predictors of transfusion-transmissible infections among blood donors in North Shewa Zone, Central North Ethiopia

Tekalign Deressa<sup>1,2\*</sup>, Wubet Birhan<sup>1</sup>, Bamlaku Enawgaw<sup>1</sup>, Molla Abebe<sup>1</sup>, Habtamu Wondiferaw Baynes<sup>1</sup>, Mekuria Desta<sup>3</sup>, Betelihem Terefe<sup>1</sup>, Mulugeta Melku<sup>1</sup>

**1** School of Biomedical and Laboratory Sciences, College of Medicine and Health Sciences, University of Gondar, Gondar, Ethiopia, **2** Ethiopian Public Health Institute, Addis Ababa, Ethiopia, **3** Debre Berhan Blood Bank, North Shoa Zone, Debre Berhan, Ethiopia

\* [tekalign09@gmail.com](mailto:tekalign09@gmail.com)

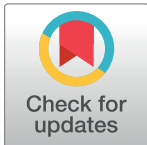

## Abstract

### Background

Transfusion-transmissible infections (TTIs) pose a significant challenge for the availability and safety of blood transfusion. The aim of this study was to investigate the prevalence and risk factors for TTIs among blood donors in North Shewa zone, central North Ethiopia.

### Methods

A retrospective survey of blood donors' medical records was conducted from April 2014 to June 2017 to assess the presence of hepatitis B virus (HBV), hepatitis C virus (HCV), human immunodeficiency virus (HIV), and syphilis infections. Descriptive statistics such as percentage, median and interquartile range were used to summarize the data.

### Results

Out of 8460 donations, 207 (2.4%, 95% CI 2.06–2.71%) had serological evidence of infection with at least one pathogen. Four of the blood donors (0.047%) had co-infection with more than one pathogen; 2HIV/HBV and 2HIV/syphilis. The overall prevalence of HBV, HCV, HIV, and syphilis among the donors were 1.2% (95% CI 0.98–1.45%), 0.32% (95% CI 0.2–0.44%), 0.25% (95% CI 0.14–0.35%), and 0.71% (95% CI 0.53–0.89%) respectively. Male sex was significantly associated with higher risk of HBV (OR 1.75, 95% CI 1.1–2.8) and syphilis sero-reactivity (OR 4.5, 95% CI 1.9–10.5). Farmers and older donors were found to be at a higher risk for syphilis seropositivity.

### Conclusion

The prevalence of TTIs among blood donors in North Shewa zone was relatively low compared to those of other geographic places in Ethiopia. However, TTIs remain a concern for the availability and safety of blood transfusion as they are still prevalent in the study area. Therefore, more efforts are required to ensure the safety of blood supply and transfusions.

## OPEN ACCESS

**Citation:** Deressa T, Birhan W, Enawgaw B, Abebe M, Baynes HW, Desta M, et al. (2018) Proportion and predictors of transfusion-transmissible infections among blood donors in North Shewa Zone, Central North Ethiopia. PLoS ONE 13(3): e0194083. <https://doi.org/10.1371/journal.pone.0194083>

**Editor:** Jason Blackard, University of Cincinnati College of Medicine, UNITED STATES

**Received:** October 13, 2017

**Accepted:** February 23, 2018

**Published:** March 26, 2018

**Copyright:** © 2018 Deressa et al. This is an open access article distributed under the terms of the [Creative Commons Attribution License](https://creativecommons.org/licenses/by/4.0/), which permits unrestricted use, distribution, and reproduction in any medium, provided the original author and source are credited.

**Data Availability Statement:** All relevant data are within the paper.

**Funding:** The authors received no specific funding for this work.

**Competing interests:** The authors have declared that no competing interests exist.

## Introduction

Blood transfusion is an essential part of any strong health system and saves millions of lives worldwide each year [1]. However, it is also a potential source for transmission of several life-threatening pathogens. These including human immunodeficiency virus (HIV), hepatitis B virus (HBV), hepatitis C virus (HCV), West Nile virus, and a myriad of bacterial and protozoal pathogens [2, 3]. The risk for acquiring transfusion-transmissible infections (TTIs) in blood donation has been significantly reduced in developed countries [1–4]. However, there are still high risks of TTIs in resource-limited settings such as sub-Saharan Africa due to inadequacies of screening facilities and qualified personnel [3, 4]. According to recent estimates, for example, blood transfusion has been accounted for 5–10% of HIV infections and 4–12.5% post-transfusion hepatitis in sub-Saharan Africa [5].

Ethiopia is one of the low-income countries with a high burden of TTIs. The prevalence of TTIs in Ethiopia shows a marked heterogeneity across sub-group of the population, geographic areas and periods of studies [6–10]. For instance, a study conducted in Northwest Ethiopia among blood donors in 2010 showed that the prevalence of HIV, HBV, HCV, and syphilis was 3.8%, 4.7%, 0.7%, and 1.3% respectively [6]. A similar study conducted in Eastern Ethiopia in 2016 estimated the overall seroprevalence of HIV, HBV, HCV, and syphilis at 3.16%, 9.48%, 0.73% and 0.73% respectively [7]. Furthermore, according to a recent meta-analysis report, an overall pooled prevalence of HBV and HCV among Ethiopian population was 7.4% (95%CI: 6.5–8.4) and 3.1% (95%CI: 2.2–4.4) respectively. The pooled prevalence of HBV among blood donors was 8.4% (95%CI: 5.4–12.7) [8]. These reports indicated that TTIs pose a significant threat to blood safety, and causing critical concerns to blood transfusion programs in Ethiopia.

To ensure the safety of blood supply, the government of Ethiopia has implemented careful donor selection criteria and quality assured screening of all donated blood for major TTIs, including HBV, HCV, HIV, and syphilis prior to clinical use. Furthermore, the country has implemented a number of programs to reduce the burden of blood-borne pathogens among its population. These include, but not limited to, public awareness creation on transmission and prevention of blood-borne infection, free HIV testing and counseling, antenatal screening of pregnant women for syphilis, HIV and HBV, immunization of children and at-risk groups such as health workers against HBV, and universal access to HIV antiviral therapy [11–13].

Continuous monitoring of the prevalence of TTIs among blood donors provides valuable information for improving blood safety, availability and the quality of transfusion service. Studies from different parts of Ethiopia had reflected the critical challenge of TTIs for safe blood supply [6–12]. However, data on the prevalence rate of these infections among the donor populations in North Shewa Zone blood bank, central North Ethiopia, is lacking. North Shewa Zone blood bank is one of the newly established blood banks in 2014 under the National Blood Transfusion Service Agency [13]. Most of the donor populations in this area are from small towns and rural districts. Consequently, the epidemiology of TTIs in this area could be different from those reported from other parts of the country. Therefore, this study was conducted to report the prevalence and associated factors for HBV, HCV, HIV and *T. pallidum* infections among blood donors in this part of Ethiopia, from March 2014 through June 2017.

## Materials and methods

### Study design, setting and population

This retrospective study was conducted on blood donors data recorded at North Shewa Zone blood Bank, Central North Ethiopia, from March 2014 to June 2017 (Fig 1). North Shewa is

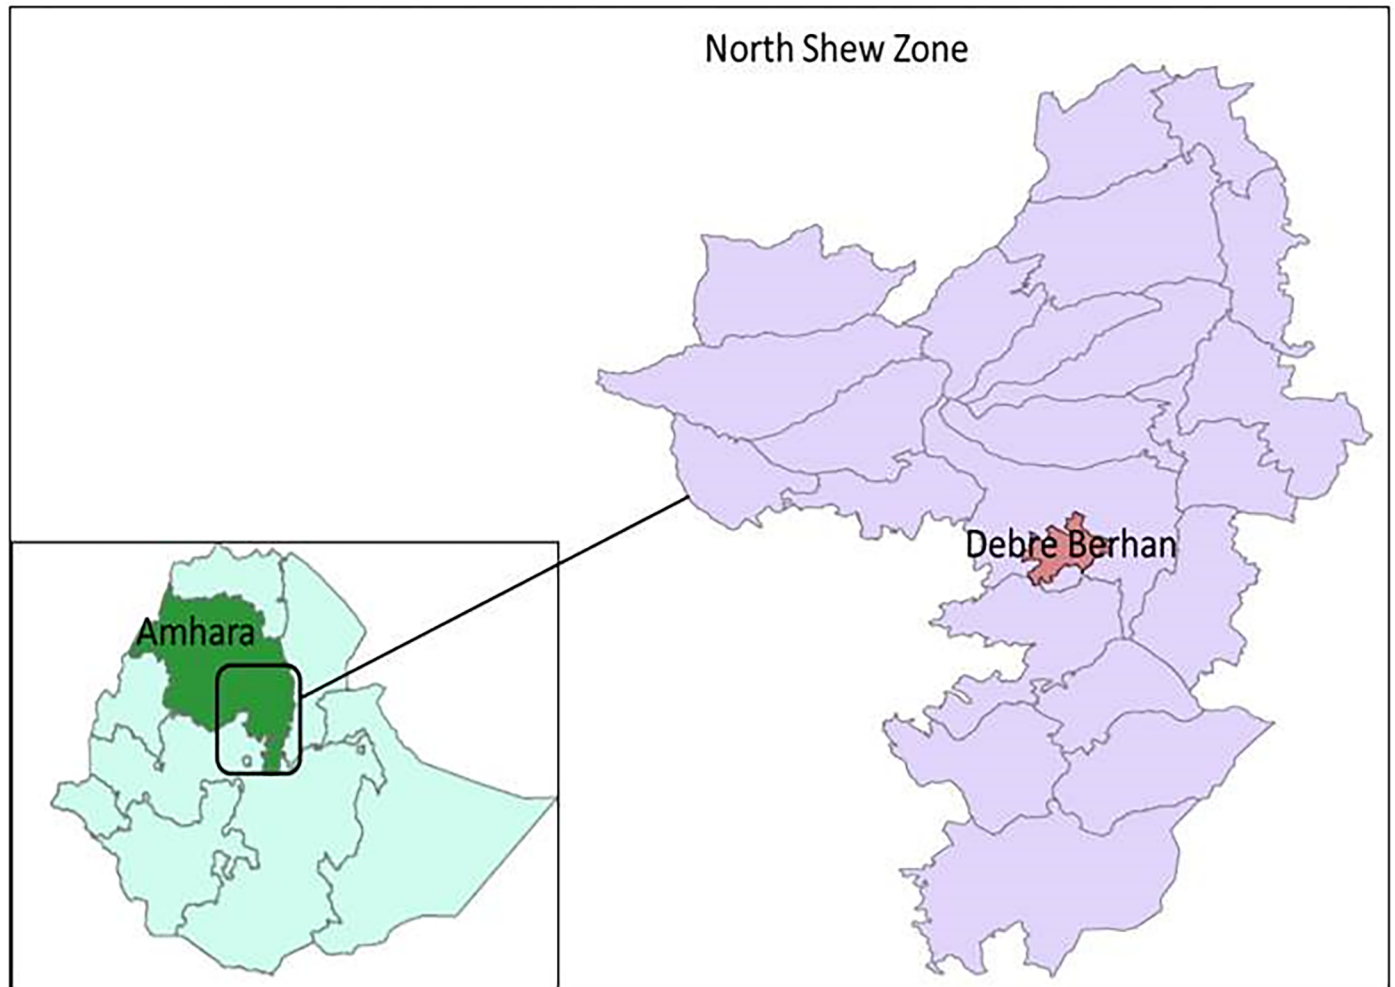

**Fig 1. Map of North Shewa zone (Right) and Ethiopia (Left).**

<https://doi.org/10.1371/journal.pone.0194083.g001>

one of 10 Zones in the Amhara Regional state. It has 24 districts, of which 3 urban and 21 rural districts. According to the 2007 Population and Housing Census of Ethiopia, the population of North Shewa Zone was about 1.9million. The major ethnic groups of the zone are Amhara and over 94% of the population is Orthodox-Christian by religion. The study area included two parts, Debre Berhan town, and surrounding districts. Debre Berhan center is the largest center that contributes to collecting most of the blood units. All blood donors were apparently healthy non-remunerated volunteers.

### Data collection

All blood donors went through a health history interview and physical examination for eligibility according to the national blood donation criteria. The eligibility criteria were age between 17 and 65 years, body weight >45 kg, physical fitness, no history of high-risk sexual behavior and practice, blood transfusion, jaundice, hepatitis, surgery, and hypertension, and current fever. Venous blood was collected from each donor by laboratory technologists following standard procedures.

## Laboratory methods

All donated blood samples were screened for HIV-1 and 2 using a Vironostika HIV Uni-Form II Ag/Ab fourth generation ELISA (Bio-Merieux, Boxtel, Netherlands). Syphilis seropositivity was tested by using rapid plasma reagin (RPR) (Omega Immutrep-RPR®, UK) following the manufacturer's instructions. Reactive samples to RPR were confirmed by using *Treponema pallidum* hemagglutination assay (TPHA) (Omega Immutrep TPHA®, UK). The presence of hepatitis B surface antigen (HBsAg) (Hepanostika HBsAg UNi-Form II, Bio-Merieux, Boxtel, Netherlands) and anti-HCV antibody (HumanGasellschaft for Biochemical and diagnostic GmbH, Germany) were determined using ELISA technique according to the manufacturer's instruction. The sensitivity and specificity of each assay are presented in [S1 Table](#).

## Statistical analysis

Data were entered, cleaned and analysed using SPSS statistical software (SPSS Inc., Chicago, IL, USA). The results were stratified by gender, age, occupation and the year of donations. Descriptive data were presented as frequencies and percentages. Chi-square test was used to compare the seroprevalence rates of TTIs among blood donors grouped according to socio-demographic characteristics and to analyze the variations in trends of TTIs during the study period. Bivariate and multivariable binary logistic regression models were fitted to identify factors associated with TTIs. The odds ratio and its 95% confidence interval (CI) were used to determine the strength of the association. Statistical significance was set at P values of less than 0.05.

## Ethics statement

This study was approved by the institutional ethics review board of the University of Gondar (IRB Ref No: O/V/P/RCS/05/479/2015). However, informed consent was not obtained from the study participants due to the nature of the study (retrospective chart review). All records of blood donors were de-identified and analysed anonymously.

## Results

### Demographic characteristics of the blood donors

A total of 8460 consecutive donors' blood was screened for four TTIs at North Shewa zone Blood bank from March 2014 through June 2017. Most of the donors were male 5644 out of 8460 (66.7%), aged between 18–26 years (71.9%). The median age of the donors was 22 year (range: 18–65). A little over half 4581/8460(54.1%) of the blood donors were students followed by government employees 2679/8460(31.7%) ([Table 1](#)). First-time donors (over 98%) represented the majority of blood donors at the study area.

### Prevalence of transfusion-transmissible infections and risk factors

Out of all blood donations screened for TTIs during the study period, 207 (2.4%, 95% CI 2.06–2.71%) had serological evidence of infection with at least one pathogen. Four of the blood donors (0.047%) had co-infection with more than one pathogen; two with HIV/HBV and two with HIV/syphilis. Hepatitis B virus was the most prevalent TTI (1.2%; 95% CI 0.98–1.45%) among the blood donors. The overall prevalence rates of HCV, HIV, and syphilis among the donors were 0.32% (95% CI 0.2–0.44%), 0.25% (95% CI 0.14–0.35%), and 0.71% (95% CI 0.53–0.89%) respectively ([Table 2](#)).

In terms of the donors' occupation, the highest seroprevalence of TTIs was observed among farmers. But, the lowest sero-prevalence (1.0%) was noted among private workers ([Table 2](#)).

**Table 1. Demographic characteristics of blood donors at Debre Berhan blood bank, Central North Ethiopia, March 2014–June 2017.**

| Variables          |                  | Frequency (N) | Percent (%) |
|--------------------|------------------|---------------|-------------|
| <b>Sex</b>         | Male             | 5644          | 66.7        |
|                    | Female           | 2816          | 33.3        |
| <b>Age (Years)</b> | 18–20            | 3096          | 36.6        |
|                    | 21–26            | 2983          | 35.3        |
|                    | 27–40            | 1970          | 23.3        |
|                    | 41–65            | 411           | 4.9         |
| <b>Occupation</b>  | Student          | 4581          | 54.1        |
|                    | Gov. employee    | 2679          | 31.7        |
|                    | Private Employee | 686           | 8.1         |
|                    | Daily laborer    | 108           | 1.3         |
|                    | Farmer           | 406           | 4.8         |
| <b>Site</b>        | Debre Berhan     | 6868          | 81.2        |
|                    | Others           | 1592          | 18.8        |
| <b>Year</b>        | 2014             | 1033          | 12.2        |
|                    | 2015             | 3342          | 39.5        |
|                    | 2016             | 2338          | 27.6        |
|                    | 2017             | 1747          | 20.7        |
| <b>Overall</b>     |                  | 8460          | 100         |

<https://doi.org/10.1371/journal.pone.0194083.t001>

Of the four TTIs screened, only HBV was observed in all occupation categories, with the highest seroprevalence amongst daily laborers 1.9% (COR 0.63; 95%CI: 0.2–2.6). The seroprevalence of syphilis (2.7%) was higher among farmers compared to other occupations.

The yearly prevalence rates of HBV, HCV, HIV, and syphilis are depicted in Fig 2. The overall yearly prevalence of the four TTIs was 2.3% (24/1033), 1.7% (58/3342), 3.3% (77/2338) and 3.0% (52/1747) in the year 2014, 2015, 2016 and 2017 respectively. Significant increases were noted in the prevalence of syphilis infections from 2014 to 2016 (P = 0.008).

The prevalence of the four TTIs varied according to the demography of the blood donors. The seroprevalence of HBV, HCV, HIV and syphilis among male donors were 1.4% (80/5644), 0.3% (18/5644), 0.2% (13/5644), and 1.0% (54/5644) respectively. The seroprevalence of HBV and HCV (Table 3), and HIV and syphilis (Table 4) among female donors were 0.8% (23/2816), 0.3% (9/2816), 0.3% (8/2816), and 0.2% (6/2816) respectively. The difference in seropositivity of HBV (OR 1.75; 95%CI: 1.1–2.8) and syphilis (OR 4.5; 95%CI: 1.9–10.5) between male

**Table 2. Positivity rate of transfusion-transmissible infections with occupation among blood donors in North Shewa Zone, Central North Ethiopia, 2014–2017.**

| Occupation       | Donation (n) | Seropositivity, n(%) |          |           |           | Overall Positivity |
|------------------|--------------|----------------------|----------|-----------|-----------|--------------------|
|                  |              | HBsAg                | HCV      | HIV       | Syphilis  |                    |
| Student          | 4581         | 54(1.2)              | 15(0.3)  | 10(0.2)   | 21(0.5)   | 100(2.2)           |
| Gov. employee    | 2679         | 41(1.5)              | 10(0.4)  | 9(0.3)    | 24(0.9)   | 84(3.1)            |
| Private Employee | 686          | 2(0.3)               | 0(0.0)   | 1(0.1)    | 4(0.6)    | 7(1.0)             |
| Daily laborer    | 108          | 2(1.9)               | 0(0.0)   | 1(0.9)    | 0(0.0)    | 3(2.8)             |
| Farmer           | 406          | 4(1.0)               | 2(0.5)   | 0(0.0)    | 11(2.7)   | 17(4.2)            |
| p-value          |              | 0.14                 | -        | -         | -         |                    |
| 95% CI           |              | 0.98–1.45            | 0.2–0.44 | 0.14–0.35 | 0.53–0.89 | 2.06–2.71          |
| Total            | 8460         | 103(1.2)             | 27(0.32) | 21(0.25)  | 60(0.71)  | 207(2.4)           |

HBsAg: Hepatitis B surface antigen, HCV: Hepatitis C virus, HIV: human immunodeficiency virus

<https://doi.org/10.1371/journal.pone.0194083.t002>

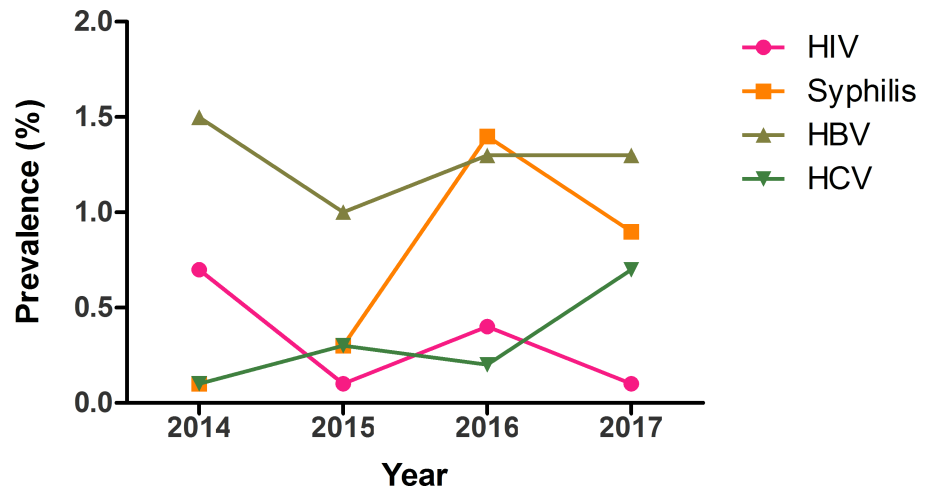

Fig 2. Yearly prevalence of transfusion-transmissible infections among blood donors in North Shewa Zone, central North Ethiopia.

<https://doi.org/10.1371/journal.pone.0194083.g002>

and female donors were statistically significant. With respect to ages of the donors, the highest and the lowest seroprevalence of HBV (1.6% vs 0.7%) was noted among donors aged between 27-40years and 41-65 years respectively ( $p > 0.05$ ). While the highest and lowest seroprevalence of Syphilis (3.6% vs 0.3%) was observed among the donors in the age group of 41-65 years and 21-26 years respectively ( $P < 0.001$ ). The prevalence of syphilis increased with the age of donors (Table 4).

### Risk factors for TTIs seropositivity

Bivariate and multivariable logistic regression analyses were performed to identify risk factors for TTIs among blood donors. Variables like age, sex, occupation, years of donation were included in the analysis. Male sex was significantly associated with higher risk of HBV (OR 1.75, 95% CI 1.1-2.8) and syphilis sero-reactivity (OR 4.5, 95% CI 1.9-10.5) (Table 3). Donors between the ages of 18-20 years were least likely to be infected by HIV (OR 4.6; 95%CI 1.1-19.1) and syphilis (OR 9.0; 95%CI 4.2-19.0) compared to the highest age group (Table 4). In multivariable logistic regression analysis, age and sex remained significant and independent predictors of syphilis seropositivity. But, none of the variables included into this study were significantly associated with HCV infection.

### Discussion

Safe blood supply is an essential component in improving health care. However, the risk of TTIs remains a critical concern for the safety of blood transfusion programs in resource-limited countries [14-16]. Thus, up-to-date data on the proportion of TTIs among blood donors, especially in TTIs high burden settings like Ethiopia, would inform policy makers to formulate strategies to plan, implement, and evaluate performances. To our knowledge, this is the first comprehensive study on the epidemiology of TTIs among blood donors in North Shewa Zone, Central North Ethiopia.

In this study, we found that 2.4% of the donated blood was tested seropositive for at least one of the screened TTIs. This was relatively a low prevalence when compared to the rates reported from other parts of Ethiopia, which ranged from 6.6% to 29.5% [7, 9, 15, 16]. Several explanations can be put forward for the lower prevalence of TTIs in this study. First, all of the

**Table 3. Seroprevalence of HBV and HCV infections according to socio-demographic characteristics of blood donors at Debre Berhan Blood Bank, Central North Ethiopia.**

| Variables               | HBV+    | COR(95% CI)    | P-value | HCV+    | COR(95% CI)   | P-value |
|-------------------------|---------|----------------|---------|---------|---------------|---------|
|                         | n(%)    |                |         | N(%)    |               |         |
| <b>Sex</b>              |         |                |         |         |               |         |
| Male                    | 80(1.4) | 1.75 (1.1–2.8) | 0.01    | 18(0.3) | 0.9(0.4–2.2)  | 0.9     |
| Female                  | 23(0.8) | 1.0            | -       | 9(0.3)  | 1.0           | -       |
| <b>Age (Years)</b>      |         |                |         |         |               |         |
| 18–20                   | 34(1.1) | 0.66 (0.2–2.2) | 0.49    | 8(0.3)  | 1.9(0.4–9.0)  | 0.42    |
| 21–26                   | 35(1.2) | 0.61(0.2–2.0)  | 0.42    | 11(0.4) | 1.3(0.3–6.0)  | 0.72    |
| 27–40                   | 31(1.6) | 0.46(0.1–1.5)  | 0.20    | 6(0.3)  | 1.6(0.3–8.0)  | 0.57    |
| 41–65                   | 3(0.7)  | 1.0            | -       | 2(0.5)  | 1.0           | -       |
| <b>Occupation</b>       |         |                |         |         |               |         |
| Student                 | 54(1.2) | 1.0            | -       | -       | -             | -       |
| Gov. employee           | 41(1.5) | 0.77 (0.5–1.2) | 0.21    | -       | -             | -       |
| Private Employee        | 2(0.3)  | 4.1(1.0–16.0)  | 0.05    | -       | -             | -       |
| Daily laborer           | 2(1.9)  | 0.63(0.2–2.6)  | 0.53    | -       | -             | -       |
| Farmer                  | 4(1.0)  | 1.2(0.4–3.3)   | 0.72    | -       | -             | -       |
| <b>Year of Donation</b> |         |                |         |         |               |         |
| 2014                    | 15(1.5) | 0.9(0.5–1.7)   | 0.77    | 1(0.1)  | 7.1(0.9–54.9) | 0.06    |
| 2015                    | 35(1.0) | 1.3(0.7–2.1)   | 0.39    | 9(0.3)  | 2.6(1.1–6.1)  | 0.03    |
| 2016                    | 30(1.3) | 1.0(0.6–1.8)   | 0.92    | 5(0.2)  | 3.2(1.1–9.2)  | 0.03    |
| 2017                    | 23(1.3) | 1.0            | -       | 12(0.7) | 1.0           | -       |

HBV: hepatitis B virus, HCV: Hepatitis C virus, COR: crude odds ratio, CI: confidence intervals

<https://doi.org/10.1371/journal.pone.0194083.t003>

blood donors in our study were voluntary donors, while in the previous studies over 90% of donations were by replacement donors (i.e., a friend or family member of the recipient who donates to replace the stored blood used in a transfusion) [7, 15, 16]. Second, over half of the

**Table 4. Sero-prevalence of HIV and syphilis infections according to socio-demographic characteristics of blood donors at Debre Berhan Blood Bank, Central North Ethiopia.**

| Variables               | HIV+    | COR(95% CI)    | P-value | Syphilis+ | COR(95% CI)   | P-value |
|-------------------------|---------|----------------|---------|-----------|---------------|---------|
|                         | n(%)    |                |         | N(%)      |               |         |
| <b>Sex</b>              |         |                |         |           |               |         |
| Male                    | 12(0.2) | 1.0            | -       | 54(1.0)   | 1.0           | -       |
| Female                  | 8(0.3)  | 0.8(0.3–1.9)   | 0.64    | 6(0.2)    | 4.5(1.9–10.5) | <0.001  |
| <b>Age (Years)</b>      |         |                |         |           |               |         |
| 18–20                   | 5(0.2)  | 4.6(1.1–19.1)  | 0.03    | 13(0.4)   | 9.0(4.2–19.0) | <0.001  |
| 21–26                   | 8(0.3)  | 2.7(0.7–10.3)  | 0.14    | 8(0.3)    | 14(5.9–33.4)  | <0.001  |
| 27–40                   | 5(0.3)  | 2.9(0.7–12.1)  | 0.15    | 24(1.2)   | 3.1(1.6–5.9)  | 0.001   |
| 41–65                   | 3(0.7)  | 1.0            | -       | 15(3.6)   | 1.0           | -       |
| <b>Year of Donation</b> |         |                |         |           |               |         |
| 2014                    | 7(0.7)  | 1.0            | -       | 1(0.1)    | 1.0           | -       |
| 2015                    | 4(0.1)  | 5.7(1.7–19.5)  | 0.006   | 10(1.3)   | 0.3(0.04–2.5) | 0.28    |
| 2016                    | 9(0.4)  | 1.8(0.7–4.8)   | 0.26    | 33(1.4)   | 0.1(0.01–0.5) | 0.008   |
| 2017                    | 1(0.1)  | 11.9(1.5–96.9) | 0.02    | 16(0.9)   | 0.1(0.01–0.8) | 0.029   |

HIV: human immunodeficiency virus, COR: crudes odds ratio, CI: confidence interval

<https://doi.org/10.1371/journal.pone.0194083.t004>

donors in our study were students and about 40% were employed, unlike other studies [10, 15]. These suggest that the blood donors in the study area might be well aware of their health conditions in terms of TTIs, and it is likely that they might have better awareness on transmission routes and preventions of these infections. Third, it could also relate to variations in donors selection procedure, socioeconomic status, lifestyle and level of awareness between different regions of the country. Yet, the rate found in this study is higher when compared with the prevalence rates from other developing and developed countries [17, 18]. This data suggesting that there is still a need for stringent donor selection and blood screening measures to improve the safety of blood supply.

In this study, there was no obvious increasing or decreasing trend of TTIs during 2014–2017. This could be due to a short study period for trend analysis and due to a relatively low prevalence of the TTIs in the study area.

We found that HBV was the most prevalent TTIs in the study area with 1.2% of the donated blood tested positive for HBsAg. This was relatively a low prevalence rate when compared to 9.5%, 3.6%–6.2%, and 9.48% rates from south [9], Northwest [6, 10, 19], and East Ethiopia [20] respectively. These differences in the prevalence of HBV infection across the studies might be due to some differences in socioeconomic status, risk behaviors, the rate of HBV infection in the background population, and effectiveness of donor selection strategies. It is also important mentioning that our study analysed data collected over three years unlike some of the studies that looked for the prevalence of TTIs over a short period (about a year) [9, 16, 19]. Thus, the observed variations in TTIs prevalence across the studies could be due to such differences. Our study also found that HBV prevalence was higher among male donors than females. This was in agreement with a number of previous studies, although reasons for such gender disparity are unclear [17, 18, 21]. Gender differences in behavioral risk factors such as having multiple sex partners could explain the finding higher prevalence of HBV infection in male donors.

The overall seroprevalence of HCV among the donors was 0.32% (95% CI 0.2–0.44%). This study also revealed that there were no significant differences in HCV infection with respect to the demographic characteristics of the donors possibly due to the overall low rate of HCV. When compared with previous studies from other parts of Ethiopia, the finding 0.32% prevalence rate was lower than those from Gondar (0.7%–5.8%), Jigjiga (0.73%) and Wolayta Sodo (8.5%) [6, 7, 9, 10]. It was also lower than those of the other countries such as Nigeria (6.0%), Tanzania (8.0%), and Equatorial Guinea (3.71%) [22–24]. The variation in the prevalence of HCV infections across studies might be due to differences in risk behaviors such as injecting drug use and sharing objects for skin piercing between different geographical areas.

The 0.25% prevalence rate of HIV among blood donors in North Shewa zone was lower than the previous reports from Gondar (2.24%), Jimma (2.1%), Hawassa (1.6%) and Wolayta Sodo (6.4%), Ethiopia [9, 15, 16, 25]. This could be due to differences in sociodemographic risks factors, HIV prevalence in the general population, health education programs, and donor selection schemes across the study areas. Our study did not find a significant difference in HIV prevalence with the gender of the donors. This was in accordance with some of the previous studies [18, 20, 26]. We also noted that younger donors (18–20 years) were the least affected group by HIV infection, which was inconsistent with a number of previous reports [25–27]. The discrepancy between our finding and others could be attributed to the fact that most of the donors between the ages of 18–20 years in our study were university students who might be well aware of their HIV status.

The seroprevalence of syphilis (0.71%) found in this study was higher when compared to 0.3% among blood donors in Namibia, 0.49% among Eritrean donors and 0.0% among Iranian donors [17, 28, 29]. Nevertheless, it is low compared to 21.5% reported by Xie *et al.* among Equatorial Guinea blood donors, 7.5% by Adjei *et al.* among Ghanaian blood donors, and



4.9% by Buseri *et al.* among Tanzanian donors [22, 23, 30]. Our study also reflected the relatively low prevalence of syphilis in the study area when compared to reports from other regions in the country [7, 9, 10]. Consistent with the previous studies, our data revealed that males, older donors, and farmers were at higher risk for syphilis seropositivity [17, 18, 21]. This could be attributed to the prevalent risk behaviors such as having multiple sex partners and alcohol abuse among males than females. The relatively higher syphilis seropositivity among farmers and older donors might be related to low awareness of TTIs due to their low education levels. Of note, the prevalence of syphilis showed an increasing trend. Apart from this, our study revealed that farmers carry the highest proportion of TTIs compared to those in other occupations. Therefore, concerted efforts that target these groups are required to minimize the risk of syphilis as well as other TTIs in the general population, and to reduce their potential risk to the blood supply.

This study has some limitations in that it analysed the records of blood donors that have not been verified independently. There are no molecular data for any of the pathogens evaluated. Therefore, the accuracy of this data depends on the data collection, recording, and screening systems of the blood bank. Furthermore, it could not include all variables that might associate with TTIs due to its retrospective nature. Despite the limitations, this study highlighted the proportion and risk factors of major TTIs in the area.

In conclusion, the prevalence of TTIs among blood donors in North Shewa zone was found to be low compared to those of other geographic places in Ethiopia. Nevertheless, TTIs remain a concern for the safety of blood supply as they are still prevalent among the blood donors in the area. Therefore, more efforts are required to ensure the safety of blood supply and transfusions.

## Supporting information

**S1 Table. Sensitivity and specificity of the assays used for screening donated blood.**  
(DOCX)

## Acknowledgments

The authors are very grateful to North Shewa zone blood bank staffs for their unreserved cooperation during data extraction.

## Author Contributions

**Conceptualization:** Tekalign Deressa, Wubet Birhan, Bamlaku Enawgaw, Molla Abebe, Betelihem Terefe, Mulugeta Melku.

**Data curation:** Tekalign Deressa, Wubet Birhan, Bamlaku Enawgaw, Molla Abebe, Habtamu Wondiferaw Baynes, Mekuria Desta, Betelihem Terefe, Mulugeta Melku.

**Formal analysis:** Tekalign Deressa, Wubet Birhan, Bamlaku Enawgaw, Molla Abebe, Habtamu Wondiferaw Baynes, Mekuria Desta, Betelihem Terefe, Mulugeta Melku.

**Funding acquisition:** Tekalign Deressa, Wubet Birhan, Bamlaku Enawgaw, Molla Abebe, Habtamu Wondiferaw Baynes, Betelihem Terefe, Mulugeta Melku.

**Investigation:** Tekalign Deressa, Wubet Birhan, Bamlaku Enawgaw, Molla Abebe, Habtamu Wondiferaw Baynes, Betelihem Terefe, Mulugeta Melku.

**Methodology:** Tekalign Deressa, Mekuria Desta, Betelihem Terefe, Mulugeta Melku.

**Project administration:** Mekuria Desta.

**Resources:** Mekuria Desta.

**Writing – original draft:** Tekalign Deressa, Wubet Birhan.

**Writing – review & editing:** Tekalign Deressa, Wubet Birhan, Bamlaku Enawgaw, Molla Abebe, Habtamu Wondiferaw Baynes, Mekuria Desta, Betelihem Terefe, Mulugeta Melku.

## References

1. WHO. Blood safety and availability, Geneva, Switzerland. Available at: <http://www.who.int/mediacentre/factsheets/fs279/en/>. Accessed on 12.08.2017
2. Stokx J, Gillet P, De Weggheleire A, Casas EC, Maendaenda R, Beulane AJ, et al. Seroprevalence of transfusion-transmissible infections and evaluation of the pre-donation screening performance at the Provincial Hospital of Tete, Mozambique. *BMC Infect Dis*, 2011; 11: 141. <https://doi.org/10.1186/1471-2334-11-141> PMID: 21605363
3. Tagny CT, Owusu-Ofori S, Mbanya D, Deneys V. The blood donor in sub-Saharan Africa: a review. *Transfus Med*, 2010; 20: 1–10.
4. Bloch EM, Vermeulen M, Murphy E. Blood transfusion safety in Africa: a literature review of infectious disease and organizational challenges. *Transfus Med Rev*. 2012; 26: 164–180. <https://doi.org/10.1016/j.tmr.2011.07.006> PMID: 21872426
5. Nagalo MB, Sanou M, Bisseye C, Kabore MI, Nebie Y, Kienou K, et al. Seroprevalence of human immunodeficiency virus, hepatitis B and C viruses and syphilis among blood donors in Koudougou (Burkina Faso). *Blood Transfus*. 2011; 9:419–24. <https://doi.org/10.2450/2011.0112-10> PMID: 21839011
6. Tessema B, Yismaw G, Kassu A, Amsalu A, Mulu A, Emmrich F, et al. Seroprevalence of HIV, HBV, HCV and syphilis infections among blood donors at Gondar University Teaching Hospital, Northwest Ethiopia: declining trends over a period of five years. *BMC infect dis*. 2010; 10:111. <https://doi.org/10.1186/1471-2334-10-111> PMID: 20459703
7. Mohammed Y, Bekele A. Seroprevalence of transfusion transmitted infection among blood donors at Jigjiga blood bank, Eastern Ethiopia: retrospective 4 years study. *BMC Research Notes*, 2016; 9:129 <https://doi.org/10.1186/s13104-016-1925-6> PMID: 26922241
8. Belyhun Y, Maier M, Mulu A, Diro E, Liebert UG. Hepatitis viruses in Ethiopia: a systematic review and meta-analysis. *BMC infect dis*. 2016; 16:761. <https://doi.org/10.1186/s12879-016-2090-1> PMID: 27993129
9. Bisetegn FS, Bekele FB, Ageru TA, Wada FW. Transfusion-Transmissible infections among voluntary blood donors at Wolaita Sodo University teaching referral hospital, south Ethiopia. *Canadian J Infect Dis Med Micr*. 2016; Aug 15; 2016.
10. Diro E, Alemu S. Blood safety & prevalence of transfusion transmissible viral infections among donors at the Red Cross Blood Bank in Gondar University Hospital. *Ethiop med j*. 2008; 46(1):7 PMID: 18711984
11. Federal Democratic Republic of Ethiopia. National expanded programme on immunization comprehensive multi-year plan 2011–2015. Addis Ababa: Federal Ministry of Health.
12. WHO. Blood donor selection: guidelines on assessing donor suitability for blood donation. Available at: [http://www.who.int/bloodsafety/publications/guide\\_selection\\_assessing\\_suitability.pdf](http://www.who.int/bloodsafety/publications/guide_selection_assessing_suitability.pdf). Accessed date, 12/08/2017
13. WHO. Blood Safety in Ethiopia, WHO Regional office for Africa. Available at: <http://www.afro.who.int/en/ethiopia/country-programmes/topics/4466-blood-safety.html>. Accessed date: 28/12/2016.
14. Jayaraman S, Chalabi Z, Perel P, Guerriero C, Roberts I. The risk of transfusion-transmitted infections in sub-Saharan Africa. *Transfusion* 2010; 50: 433–442. <https://doi.org/10.1111/j.1537-2995.2009.002402.x> PMID: 19843290
15. Biadgo B, Shiferaw E, Woldu B, Alene KA, Melku M. Transfusion-transmissible viral infections among blood donors at the North Gondar district blood bank, Northwest Ethiopia: A three year retrospective study. *PLoS ONE* 2017; 12(7):e0180416. <https://doi.org/10.1371/journal.pone.0180416> PMID: 28678865
16. Bonja F, Hussein M, Alemu J, Gemechu D, Birhaneslassie. The prevalence of transfusion transmitted infections: A focus on hepatitis B virus among blood donors at Hawassa blood bank center, Southern Ethiopia. *Int J Blood Transfus Immunohematol* 2017; 7:7–14.

17. Mavenyengwa RT, Mukesi M, Chipare I, Shoombi E. Prevalence of human immunodeficiency virus, syphilis, hepatitis B and C in blood donations in Namibia. *BMC Public Health* 2014; 14:424. <https://doi.org/10.1186/1471-2458-14-424> PMID: 24884633
18. Farshadpour F, Taherkhani R, Tajbakhsh S, Gholizadeh Tangestani M, Hajiani G, Sharifi N, et al. Prevalence and Trends of Transfusion-Transmissible Viral Infections among Blood Donors in South of Iran: An Eleven-Year Retrospective Study. *PLoS ONE* 2016; 11(6): e0157615. <https://doi.org/10.1371/journal.pone.0157615> PMID: 27309959
19. Baye G, Yohannes M. The prevalence of HBV, HCV and malaria parasites among blood donors in Amhara and Tigray regional states. *Ethiop J Health Dev.* 2007; 22(1):3–7.
20. Abate M, Wolde T. Seroprevalence of Human Immunodeficiency Virus, Hepatitis B Virus, Hepatitis C Virus, and Syphilis among Blood Donors at Jigjiga Blood Bank, Eastern Ethiopia. *Ethiop J Health Sci.* 2016; 26:2
21. Matee MIN, Magesa PM, Lyamuya EF. Seroprevalence of human immunodeficiency virus, hepatitis B and C viruses and syphilis infections among blood donors at the Muhimbili National Hospital in Dar Es Salaam, Tanzania. *BMC Pub Health* 2006, 6:21–26.
22. Xie D-D, Li J, Chen J-T, Eyi UM, Matesa RA, Obono MMO, et al. Seroprevalence of Human Immunodeficiency Virus, Hepatitis B Virus, Hepatitis C Virus, and *Treponema pallidum* Infections among Blood Donors on Bioko Island, Equatorial Guinea. *PLoS ONE* 2015; 10(10): e0139947. <https://doi.org/10.1371/journal.pone.0139947> PMID: 26448460
23. Buseri FI, Muhibi MA, Jeremiah ZA. Sero-epidemiology of transfusion-transmissible infectious diseases among blood donors in Osogbo, south-west Nigeria. *Blood Transfus* 2009; 7: 293–299. <https://doi.org/10.2450/2009.0071-08> PMID: 20011640
24. Matee MI, Lyamuya EF, Mbena EC, Magessa PM, Sufi J, Marwa GJ, et al. Prevalence of transfusion-associated viral infections and syphilis among blood donors in Muhimbili Medical Centre, Dar es Salaam, Tanzania. *East Afr Med J* 1999; 76: 167–171. PMID: 10442119
25. Yami A, Alemseged F, Hassen A. Hepatitis b and c viruses infections and their association with human immunodeficiency virus: a cross-sectional study among blood donors in Ethiopia. *Ethiop J Health Sci.* March 2011; 21:1
26. Tarekegne D, Jemal M, Atanaw T, Ebabu A, Endris M, Moges F, Tessema B, Deressa T. Prevalence of human immunodeficiency virus infection in a cohort of tuberculosis patients at Metema Hospital, North-west Ethiopia: a 3 years retrospective study. *BMC Res Notes* 2016; 9:192. <https://doi.org/10.1186/s13104-016-2004-8> PMID: 27026410
27. CSA. Ethiopia Demographic and Health Survey 2011 Addis Ababa, Ethiopia Central Statistical Agency, 2012.
28. Zohreh A, Mazyar G, Bashir H, Sherun A and Seyed MA. Zero prevalence of syphilis among blood donors in Tehran, Iran. *Transf Today.* 2005; 64:24
29. Fessehaye N, Naik D, Fessehaye T. Transfusion transmitted infections: A retrospective analysis from the National Blood Transfusion Service in Eritrea. *Pan Afri Med J* 2011; 9:40
30. Adjei AA, Kudzi W, Armah H and Adiku T. Prevalence of antibodies to syphilis among blood donors in Accra, Ghana. *Jpn J Infect Dis.* 2003; 56(4):165–7. PMID: 14583641
